# Supplementary material for: Integration of IL-2 and IL-4 signals coordinates divergent regulatory T cell responses and drives therapeutic efficacy
Source: eLife. 2021 Feb 22;10:e57417. doi: 10.7554/eLife.57417 (PMC7899647; doi:10.7554/eLife.57417)
Supplement: Figure 3—source data 1. — Values were obtained by analyzing the suppression assay supernatants by ELISA. [file elife-57417-fig3-data1.xlsx]

## Sheet: Fig3SourceData1A-B
A	Numeric values for Figures 3B-C
		IL-10 (pg/ml)
		No cyto			IL-2			IL-4			IL-2/4
Tconv:Treg ratio	2	741.486	962.411	672.615	1022.34	1076.01	1200.33	3550	3752	4272	9759.81	9337.76	7193.18
	4	652.937	608.215	591.221	718.231	726.281	942.734	3386.71	3512.52	4219.38	5603.34	7929.77	6177.51
	8	865.812	754.008	403.39	381.029	462.423	668.143	3049.3	5663.96	4958.25	6802.01	5232.76	5082.92
	16	410.545	240.603	548.288	444.534	413.229	478.522	2143.43	2581.49	2787.37	4989.13	6361.66	6144.34
	32	460.634	762.058	690.503	284.43	607.321	877.44	884.136	2167.45	2327.58		5013.15	5233.9
	64	647.571	264.753	401.601	219.136	520.561	487.467	369.438	1279.88	1814.02	3733.27	4137.02	4146.17
	Tconv	325.975	316.825	363.719	325.975	316.825	363.719	325.975	316.825	363.719	325.975	316.825	363.719
	Treg	132.376	86.7601	0	228.081	432.906	480.311	495.253	1347.36	1269.59	4783.26	5762.32	4299.44
		IL-4 (pg/ml)
		No cyto			IL-2			IL-4			IL-2/4
Tconv:Treg ratio	2	5609.23	5162.96	5519.86	34.5184	155.949	214.507	62.2563	70.2695	52.3939	700.613	573.181	34.1242
	4	7430.69	7780.81	8813.28	724.269	1044.8	2000.83	705.777	447.506	213.891	778.459	108.238	61.8502
	8	9448.78	9792.12	11345.5	2768.87	3493.75	4467.66	1328.34	1741.33	1973.09	1291.39	537.99	723.54
	16	10317.9	10131.8	10642.8	5249.26	8100.72	11007	7444.25	7829.5	4825.79	1189.55	868.568	1790.46
	32	10832	7976.21	7455.97	7277.83	6610.27	7814.71	6828.47	9220.72	11212.9	3233.27	3719.54	3775.53
	64	12191.8	7664.31	14010.8	6891.34	8431.73	9681.17	8018.12	9777.94	8827.45	4346.57	4899.49	4824.31
	Tconv	7049.43	6619.81	6769.62	7049.43	6619.81	6769.62	7049.43	6619.81	6769.62	7049.43	6619.81	6769.62
	Treg	131.91	0	11.7116	1873.85	1258.69	205.877	330.39	101.706	19.7248	1850.17	1996.27	2133.3
		IL-17A (pg/ml)
		No cyto			IL-2			IL-4			IL-2/4
Tconv:Treg ratio	2	1810	1486	872	539	692	614	915.969	1008.1	1093.28	583.588	596.993	465.129
	4	1267.29	1306.81	921.585	898.891	1295.57	955.297	989.998	808.464	1010.27	526.706	952.031	577.329
	8	1719.94	1055.78	807.149	919.984	1725.32	1369.6	1251.55	1102.74	1242.5	887.664	1000.75	863.782
	16	1239.39	1026.72	866.22	876.641	1335.1	1296.05	869.157	826.971	1156.15	1290.74	1196.09	1396
	32	1256.61	698.817	778.958	1252.7	1444.38	1483.57	1070.29	640.267	941.825	1337.62	904.402	1248.28
	64	1479.37	804.606	855.031	737.157	938.559	1046.4	1019.26	735.184	872.967	1375.99	823.638	1649.72
	Tconv	1121.32	844.277	818.847	1121.32	844.277	818.847	1121.32	844.277	818.847	1121.32	844.277	818.847
	Treg	83.9918	0	6.24852	24.2907	27.9649	24.2226	10.6144	126.08	38.5793	90.971	48.7855	289.787
B	Numeric values for Figures 3E-F
		IL-10 (pg/ml)
		No cyto			IL-2			IL-4			IL-2/4
Tconv:Treg ratio	2	207.656	124.701	0	68.4226		153.031	144.202	207.475	373.749	268.54	206.739	116.245
	4	498.803	282.583	306.132	594	734	679	469.394	662.89	773.249	523.102	470.13	254.561
	8	325.934	611.194	373.567	888.758	699.676	690.112	663.626	599.617	693.79	434.815	348.735	201.589
	16	501.478	491.31	451.17	1080.05	688.64	966.745	435.55	634.197	438.493	618.746	384.785	392.878
	32	131.123	544.829	400.327	934.373		748.234	428.193	414.95	663.626	539.288	568.717	260.447
	64	356.44	318.442	617.081	982.931			1134.49		310.477	1052.83	286.933	320.041
	Tconv	188.389	234.951	312.019	188.389	234.951	312.019	188.389	234.951	312.019	188.389	234.951	312.019
	Treg	221.571	80.8146	80.8146	196.439		138.317	262.654	224.397	334.02	451.001	0	223.661
		IL-4 (pg/ml)
		No cyto			IL-2			IL-4			IL-2/4
Tconv:Treg ratio	2	7825.1	10536.3	15532.1	5118	4881	4584	1545.16	2606.41	1244.59	3621.42	4376.95	5585.57
	4	7742.5	8633.34	12251	7355	7255	6602	5062.42	4049.98	3763.18	4139.9	5057.74	5978.4
	8	5164.23	6149.1	7166.71	8456	9173	8571	6995.04	6029.54	5735.97	6993.4	6026.04	6325.45
	16	4025.55	4062.27	3823.86	7111	8577	9175	4089.68	6713.61	7258.95	5924.68	5254.16	4953.81
	32	4297.94	4815.68	5087.07	7787	7801	7434	3065.1	7034.74	8495.36	5515.27	5480.47	4756.23
	64	2418.51	3187.8	4279.83	7741	8893	7152	4154.38	7707.36	8713.26	7424.77	5044.2	5624.1
	Tconv	4644.33	4668.4	5859.31	4644.33	4668.4	5859.31	4644.33	4668.4	5859.31	4644.33	4668.4	5859.31
	Treg	18.8539	48.127	14.3885	468	940	1331	96.4559	0	79.1732	418.754	366.673	253.868
		IL-17 (pg/ml)
		No cyto			IL-2			IL-4			IL-2/4
Tconv:Treg ratio	2	563.619	624.867	603.726	914	998	843	392.257	467.649	478.138	435.161	355.69	495.693
	4	721.314	712.278	653.874	780.507	986.724	1010.03	505.745	384.317	482.727	607.652	616.685	532.989
	8	463.993	357.059	313.159	785.679	734.471	1185.22	571.012	591.335	621.784	684.21	559.066	907.982
	16	481.229	408.769	527.417	899.386	793.328	936.39	684.574	776.574	665.489	636.643	590.898	778.249
	32	374.965	398.059	628.605	917.233	850.363	624.115	641.67	622.221	518.274	572.761	549.888	407.262
	64	386.233	527.919	347.019	521.771	1618.78	895.161	415.566	412.798	498.898	481.707	632.346	592.938
	Tconv	410.721	324.092	446.199	410.721	324.092	446.199	410.721	324.092	446.199	410.721	324.092	446.199
	Treg	36.4255	48.1397	43.9003	337.916	394.879	338.863	91.126	106.132	106.933	169.577	110.502	156.32

## Sheet: Fig3SourceData1C-D
C	Numeric values for Figures 3H-I
		IL-10 (pg/ml)
		No cyto			IL-2			IL-4			IL-2/4
Tconv:Treg ratio	2	185	270.25	210.25	83	0	49	136.75	190	99.25	39.25	67.5	88.75
	4	171.75	305.25	325.25	91.5	64.75	154.75	254.75	472.75	385.5	125	131	111.75
	8	219	420.25	266.75	213	163.5	235.75	345.75	444	473.25	151.5	155	102.5
	16	476.25	576	558.5	260.25	312.25	134.75	670.75	690.25	741.5	124.25	125	139.75
	32	155.75	715.75	347.5	394.25	763.75	460.25	883.75	812.5	843.25	97.25	86	64.25
	64	149.5	253.5	619	517.25	238	169.5	342.25	634.5	612.25	19.5	18.75	75
	Tconv	96	37.25	15	96	37.25	15	96	37.25	15	96	37.25	15
	Treg	47.25	0.5	41	46	49.75	62.25	63.5	181.5	167	133.5	110	112.75
		IL-4 (pg/ml)
		No cyto			IL-2			IL-4			IL-2/4
Tconv:Treg ratio	2	4416	5308	4508	1428	1236	1484	3704	3992	7084	4244	4464	4464
	4	4340	6116	8804	2988	3752	2644	4680	5276	5244	3620	2984	3420
	8	5312	6208	4968	5720	6784	5452	5120	6312	6740	4864	4564	5736
	16	4348	9068	9172	6616	6716	6456	6540	8032	8240	7272	6204	6200
	32	3532	7624	9944	8168	8464	6876	7668	9148	8700	4208	6872	5924
	64	4576	7896	6364	8312	8304	7680	7164	8272	7904	4788	5180	5320
	Tconv	2932	2916	2764	2932	2916	2764	2932	2916	2764	2932	2916	2764
	Treg	280	0	12	1104	320	840	1648	2064	2332	2044	2244	2544
		IL-17 (pg/ml)
		No cyto			IL-2			IL-4			IL-2/4
Tconv:Treg ratio	2	124	112	92	116	92	60	68	128	136	104	132	132
	4	92	80	56	184	208	152	120	312	444	84	76	96
	8	28	100	36	180	108	144	96	140	264	100	88	104
	16	48	96	64	72	88	20	96	176	96	40	100	104
	32	0	0	92	124	200	96	140	148	248	68	100	60
	64	72	84	84	120	184	76	112	96	56	48	32	108
	Tconv	184	100	108	184	100	108	184	100	108	184	100	108
	Treg	24	84	128	236	188	172	204	128	164	112	88	136
D	Numeric values for Figures 3K-L
		IL-10 (pg/ml)
		No cyto			IL-2			IL-4			IL-2/4
Tconv:Treg ratio	2	341	466	417	4471.53	5097.47	5159.82	24900.3	22436.9	20506.1	75160.4	58064.8	69775.5
	4	457.69	309.494	423.302	2744.25	3097.77	3444.26	15028.4	12467	13028.7	39863.1	35888.1	33761.3
	8	521.554	822.86	704.958	2194.27	2299.77	2301.17	12151	10859.8	10650.2	25669.7	27680.2	26020.9
	16	673.845	608.343	486.347	3999.39	3158.72	2512.63	7581.02	11033.2	8364.02	23113	27341.7	34374.6
	32	899.824	1340.32	751.627	6142.56	4497.79	2752.22	6593.13	7059.65	5837.8	20492.1	19049.8	20446.6
	64	823.679	935.85	1446.76	3986.73	3646.34	2449.33	4991.03	4305.56	2863.34	11054.8	10336.5	12332.9
	Tconv	361.895	554.305	691.857	436.979	275.691	179.105	436.979	275.691	179.105	436.979	275.691	179.105
	Treg	0	38.482	54.0386	5038.39	4944.62	6736.14	20836.7	22304.7	14947.8	62524.6	44886.9	65443.7
		IL-4 (pg/ml)
		No cyto			IL-2			IL-4			IL-2/4
Tconv:Treg ratio	2	3128	5328	3362	51.8873	132.03	120.728	129.975	150.525	124.324	281.014	456.198	509.626
	4	8574	7435	9686	269.198	258.923	170.56	143.332	123.297	441.299	125.352	152.066	463.39
	8	11776	11464	12132	795.263	944.247	1285.37	748	1097.85	1231.42	107.885	161.827	508.085
	16	13975	15472	14653	7208.74	7005.3	10324.5	2409.94	4414.02	5026.91	361.156	1304.38	1441.03
	32	13952	13980	15132	7847.83	6830.63	6579.93	6503.38	6240.35	5913.1	3508.82	3359.32	3884.87
	64	11070	13855	10990	7766.15	9311.47	8940.55	6751.01	7593.02	6108.32	4875.87	5112.19	4527.56
	Tconv	8758.69	7561.17	9433	8758.69	7561.17	9433	8758.69	7561.17	9433	8758.69	7561.17	9433
	Treg	0	26	42	81.684	796.805	94.5274	236.832	160.286	180.321	195.22	246.08	162.854
		IL-17 (pg/ml)
		No cyto			IL-2			IL-4			IL-2/4
Tconv:Treg ratio	2	498.803	282.583	306.132	280	352	230	97.9023	52.8351	86.0057	87.0554	37.4394	52.2052
	4	325.934	611.194	373.567	137.021	223.937	249.48	36.0398	49.546	34.7102	33.3106	34.9201	34.7102
	8	501.478	491.31	451.17	114.978	360.888	51.3655	22.7436	8.81751	45.4871	37.1595	15.6756	11.5467
	16	131.123	544.829	400.327	48.0764	48.5663	247.31	13.5762	25.6827	57.3138	14.8358	36.8796	22.7436
	32	356.44	318.442	617.081	173.761	49.3361	36.7396	25.3328	19.0346	35.9698	21.204	65.9914	19.5245
	64	188.389	234.951	312.019	61.3727	77.818	58.8534	23.5833	21.344	0.489862	198.744	36.0398	284.4
	Tconv	221.571	80.8146	80.8146	221.571	80.8146	80.8146	221.571	80.8146	80.8146	221.571	80.8146	80.8146
	Treg	207.656	124.701	0	198.254	168.722	131.773	47.5166	9.72725	18.2648	28.202	42.8979	36.0398
